# Supplementary material for: Facile sonochemically-assisted bioengineering of titanium dioxide nanoparticles and deciphering their potential in treating breast and lung cancers: biological, molecular, and computational-based investigations
Source: Royal Society of Chemistry journal article supplement (doi:10.1039/d3ra08908h), 2024-01-01
Supplement: d3ra08908h1.pdf [file d3ra08908h1.pdf]

# Facile Sonochemically-assisted Bioengineering of Titanium dioxide Nanoparticles and Deciphering their Potential in Treating Breast and Lung Cancers: Biological, Molecular, and Computational-based investigations

Nada K. Sedky<sup>1#</sup>, Noha Khalil Mahdy<sup>2#</sup>, Nour M. Abdel-kader<sup>1,3</sup>, Manal M. M. Abdelhady<sup>4</sup>,  
Mohamad Maged<sup>5</sup>, Aya L. Allam<sup>6</sup>, Mohammad Y. Alfaifi<sup>7</sup>, Samir N. Shamma<sup>8</sup>, Hatem A.F.M.  
Hassan<sup>6,9</sup>, Sherif Ashraf Fahmy<sup>10\*</sup>

<sup>1</sup>Department of Biochemistry, School of Life and Medical Sciences, University of Hertfordshire Hosted by Global Academic Foundation, R5 New Garden City, New Administrative Capital, Cairo 11835, Egypt

<sup>2</sup>Department of Pharmaceutics and Industrial Pharmacy, Faculty of Pharmacy, Cairo University, Kasr El-Aini Street, Cairo 11562, Egypt

<sup>3</sup>Department of Biochemistry, Faculty of Science, Ain Shams University, Cairo 11566, Egypt

<sup>4</sup>Clinical Pharmacy Department, Faculty of Pharmacy, Badr University, Cairo 11829, Egypt

<sup>5</sup>Faculty of Biotechnology, Nile University, Giza, Egypt

<sup>6</sup>School of Life and Medical Sciences, University of Hertfordshire Hosted by Global Academic Foundation, New Administrative Capital, Egypt

<sup>7</sup>King Khalid University, Faculty of Science, Biology Department, Abha 9004, Saudi Arabia

<sup>8</sup>Institute of Global Health and Human Ecology, School of Sciences & Engineering, The American University in Cairo, AUC Avenue, P.O. Box 74, New Cairo 11835, Egypt.

<sup>9</sup>Department of Pharmaceutics and Industrial Pharmacy, Faculty of Pharmacy, Cairo University, 11562 Cairo, Egypt.

<sup>10</sup>Department of Chemistry, School of Life and Medical Sciences, University of Hertfordshire Hosted by Global Academic Foundation, R5 New Garden City, New Capital, Cairo 11835, Egypt

**\*Correspondence:** Sherif Ashraf Fahmy; **email:** [sheriffahmy@aucegypt.edu](mailto:sheriffahmy@aucegypt.edu);

**Tel.:** +20-1222613344

**#**These authors contributed equally to this work.

**Table S1.** Primers used in RT-qPCR.

| <b>Primer ID</b> | <b>Primer sequence (5' – 3')</b> |
|------------------|----------------------------------|
| $\beta$ -actin F | CACCATTGGCAATGAGCGGTTC           |
| $\beta$ -actin R | AGGTCTTTGCGGATGTCCACGT           |
| Bax F            | TCAGGATGCGTCCACCAAGAAG           |
| Bax R            | TGTGTCCACGGCGGCAATCATC           |
| BAK F            | CGACATCAACCGACGCTATG             |
| BAK R            | CCACTCTCAAACAGGCTGGTG            |

**Table S2.** Antibodies used for Western blot analysis

| <b>Antibody</b>             | <b>Species</b> | <b>Dilution used</b> | <b>Company</b> |
|-----------------------------|----------------|----------------------|----------------|
| Caspase-3                   | Rabbit         | 1:1000               | Cell Signaling |
| Caspase-7                   | Rabbit         | 1:1000               | Cell Signaling |
| B-actin                     | Mouse          | 1:1000               | Invitrogen     |
| Anti-mouse IgG, HRP-linked  | Horse          | 1:3000               | Cell Signaling |
| Anti-rabbit IgG, HRP-linked | Goat           | 1:3000               | Invitrogen     |

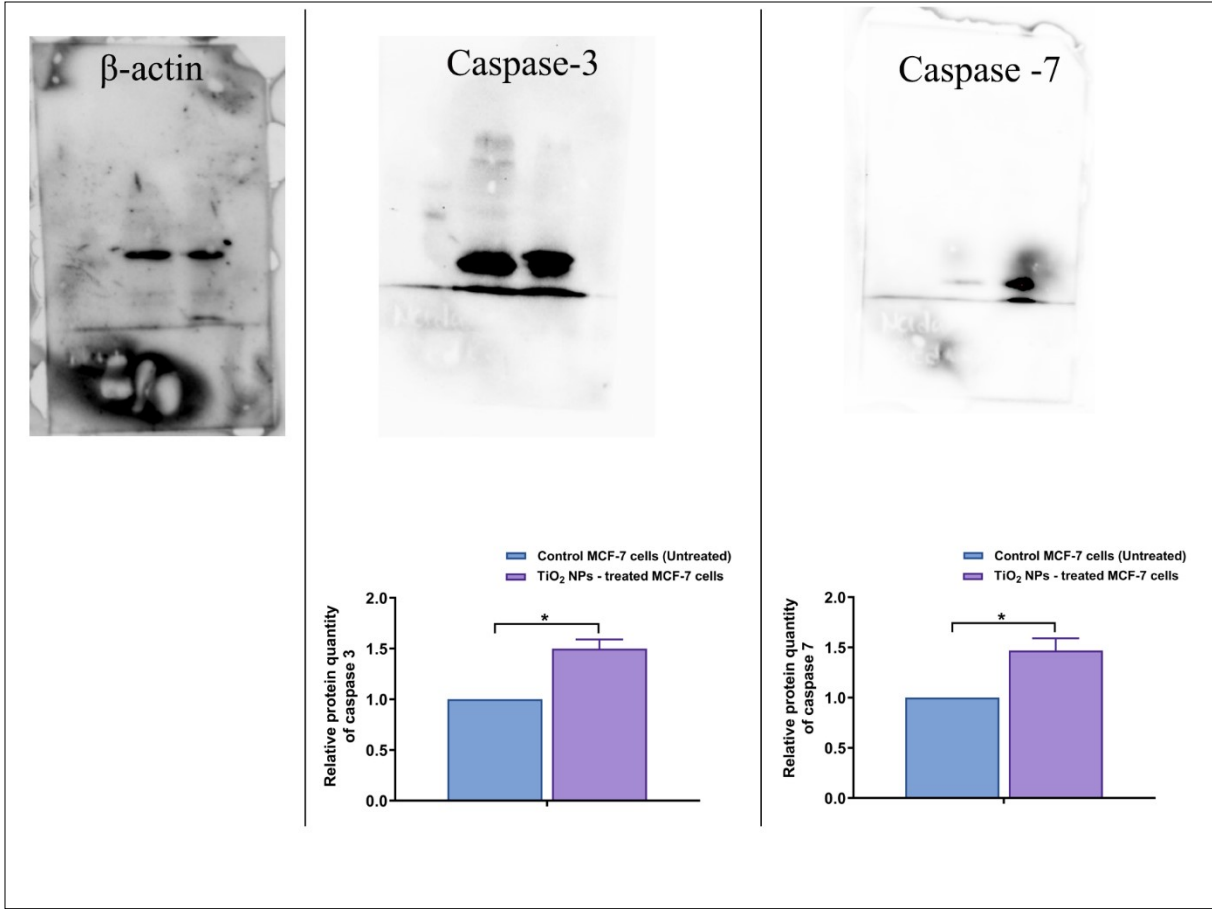

**Figure S1:** Chemiluminescence membranes for  $\beta$ -actin, caspases 3 and 7, and their corresponding bar graphs below.
